# Supplementary material for: Pathology in Captive Wild Felids at German Zoological Gardens
Source: PLoS One. 2015 Jun 18;10(6):e0130573. doi: 10.1371/journal.pone.0130573 (PMC4472349; doi:10.1371/journal.pone.0130573)
Supplement: S1 Table — (XLSX) [file pone.0130573.s001.xlsx]

## Sheet: S1 Table
animal number	species	sex	age	interval between death and necropsy (days)	nitrogen in eye chamber	respiratory	skin	musculoskeletal	endocrine	central and peripheral nervous system	liver and pancreas	gastrointestinal	urogenital tract					cardiovascular	misc.	hematopoietic
													kidney				other
													glomerulum	tubuli	interstitium	miscellaneous
1	cheetah	male	10	2	120	biphasic thoracic mesothelioma, lung atelectasis, chronic pleuritis, lung: minimal extramedullary hematopoesis			adrenal cortical hemorrhages	lympho-histiocytic leptomeningitis, meninx fibrosis and mineralization, neuronal lipofuscinosis, spinal cord: minimal myelinophagia and spheroids	hepatic fatty degeneration, cholestasis	Helicobacter-like organisms (stomach)							biphasic thoracic mesothelioma, chylothorax	splenic myelolipoma, myeloid dominance in the bone marrow
2	cheetah	female	2	0			ventral abdominal wall: acute hemorrhages	acute hemorrhages: head and sinus frontalis (trauma suspected)			necrosis of adipose tissue next to pancreas							lipomatosis cordis	necrosis of abdominal adipose tissue, acute hemorrhages abdomen
3	cheetah	female	11	3		anthracosis in the lung and lymph nodes; pleural effusions			vacuolization of adrenal gland (all zones)	lympho-plasmacytic meningitis, perivascular macrophages; pituitary gland: lipofuscinosis; mineralization of meninx (thoracic spinal cord)	liver: pigment storage in macrophages and hepatocytes (hemosiderosis)	follicular gastritis, hemorrhagic gastritis with necrosis, thrombi, intralesional bacteria, gastric nematodes; hemorrhagic enterocolitis	membranous glomerulonephritis	degeneration, necrosis; proteinaceous casts; concrements	lympho-plasmacytic inflammation; fibrosis	nephron loss; lympho-plasmacytic pyelitis	urocystitis, urethritis, cystic ovaries	myocardial fibrosis, lipomatosis cordis		bone marrow: myeloid dominance, spleen: hemosiderosis, iliac lymph nodes: lymphoid depletion, sinus histiocytosis, eryhtrophagocytosis
4	cougar	female	18	0	150	lung hemosiderosis, lung fibrosis	multifocal cutaneous lymphoma; lympho-histiocytic pododermatitis;	right femur: hemangiosarcoma	thyroid gland adenocarcinoma; parathyroid gland hyperplasia; lympho-plasmacytic adrenalitis with mild vacuolation of zona fasciculata	lympho-histiocytic meningitis, psammomatous meningioma, spinal cord: mild, focal lympho-histiocytic inflammation	liver: hemangiosarcoma	lympho-histiocytic glossitis with few neutrophils	mesangio-proliferative glomerulonephritis, sclerosis	intra-epithelial pigment; proteinaceous casts	lympho-plasmacytic inflammation; fibrosis		uterus: glandular cystic hyperplasia	left ventricle: lipomatosis cordis	renal hemangiosarcoma; granulomatous steatitis; right eye: cornea ulcer, purulent keratitis, hyperplastic cornea epithelium, lympho-plasmacytic iridocyclitis; left eye: lympho-histiocytic iridocyclitis	spleen, bone marrow: hemangiosarcoma
5	cougar	male	14	0	260	tonsil: follicular hyperplasia; mucopurulent bronchitis, lung: anthracosis, mineralizations, interstitial fibrosis		Mm. longissimus, quadriceps: swollen myofibers	bilateral parathyroid hyperplasia	neuronal lipofuscinosis; choroid plexus: fibrosis; spinal cord: focal spheroid	pancreas: nodular hyperplasias	Helicobacter-like organisms (stomach)	mesangio-proliferative glomerulonephritis, sclerosis	proteinaceous casts; concrements	lympho-plasmacytic inflammation; fibrosis	nephron loss; lympho-plasmacytic pyelitis		endocardiosis		spleen: nodular hyperplasia
6	leopard	male	18	0	150	chronic purulent pneumonia, pharynx: hematoma (trauma)			cystic thyroid adenoma, carcinoma of pars intermedia of pituitary gland	focal gliosis	pancreas: nodular hyperplasia and cysts; bile duct cysts		mesangio-proliferative glomerulonephritis	dilation	lympho-plasmacytic inflammation; fibrosis	nephron loss		endocardiosis (left atrioventricular valve)
7	leopard	female	9.75	3		lung: fibrosis and mineralization			adenoma of parathyroid gland	ganglioneuritis of Nervus trigeminus	pancreas: nodular hyperplasia	fractured caninus, ulcerative gastritis	amyloidosis	concrements; basement membrane mineralization	lympho-plasmacytic inflammation; fibrosis	nephron loss	purulent endometritis		anemia, systemic mineralizations
8	leopard	male	16	2	< 50	lung mineralization and fibrosis, lung lymph nodes: anthracosis		deformation of sternal vertebrae, ankylosis at cervical, thoracic and lumbar segments	abdominal cavity: neuroendocrine tumor, suspected islet cell tumor		liver: hepatocellular vacuolization, pancreas: amyloidosis of islets of Langerhans	purulent pulpitis of mandibular canini	mesangio-proliferative glomerulonephritis, sclerosis		lympho-plasmacytic inflammation; fibrosis
9	leopard	female	13	1	< 50	lung, lung lymph node: metastasis of an osteosarcoma		osteosarcoma in lumbar segment with multiple metastases	adrenal gland: metastasis of osteosarcoma, cortical hyperplasia		pigment storage						kidney: metastasis of an osteosarcoma; adenocarcinoma of the mammary gland with duct ectasia; uterus: hypertrophy of arterial wall			larynx: lymphoid hyperplasia; mesenteric lymph nodes: lymphoid depletion
10	leopard	male	15	1	< 50	anthracosis in lung and lymph nodes		focal purulent osteomyelitis with osteolysis, myelofibrosis and chondroid metaplasia in the thoracic segment, discospondylitis, prolapse of intervertebral disc	adrenal gland: capsular protrusions; pituitary gland: pigment storage, perivascular macrophages in pars nervosa, lymphocytic thyroiditis and cystic dilations	neuronal lipofuscinosis, meningeal fibrosis, single leptomeningeal melanocytes, thoracic spinal cord: spheroids, myelinophagia	hepatocellular degeneration, fibrosis, focal telangiectasia, lympho-plasmacytic and purulent hepatitis, hemosiderosis; pancreas: deposition of adipose tissue	stomach: submucosal edema; small intestine: eosinophilic enteritis		degeneration, necrosis; intra-epithelial pigment; proteinaceous casts	lympho-plasmacytic inflammation; fibrosis	lympho-plasmacytic pyelitis	prostate: interstitial fibrosis	myocardial fibrosis, lipomatosis cordis	rete mirabile: chondroid metaplasia and hemosiderosis	bone marrow: hemosiderosis; multiple lymph nodes: hemosiderosis
11	leopard	male	7	1		pulmonary hemorrhages, alveolar emphysema, edema and congestion, perivascular lympho-plasmacytic infiltrates, death by suffocation			adrenal gland: acute hemorrhages	cerebrum: single chromatolytic neurons, (nucleus ruber), neuronal lipofuscinosis, spheroids; choroid plexus and fourth ventricle: mineralizations; spinal cord: dilated myelin sheaths, meningeal mineralizations; pituitary gland: Herring bodies, brown pigment in macrophages		500g meat in esophagus (obstruction), 2.3kg meat in stomach, stomach: glandular dilation, lympho-histiocytic inflammation with eosinophils						myocardial fibrosis
12	leopard	female	3	2				skeletal muscle: caliber variation	adrenal gland: thrombosis, endothelial activation in medulla, cortical areas: acute hemorrhages	cerebrum: single chromatolytic neurons, single thrombosis; spinal cord: single spheroids	pancreas: hyaline thrombi and fibrin thrombi	gastric hemorrhages with hyaline thrombi		degeneration, necrosis; dilation		lympho-plasmacytic pyelitis		moderator bands, hyaline thrombi, muscle fiber degeneration and necrosis, lympho-histiocytic myocarditis, acute hemorrhages, lipomatosis cordis	disseminated intravascular coagulation	spleen: lymphoid depletion, necrosis, extramedullary hematopoesis, hyaline thrombi; mesenteric lymph nodes and tonsil: lymphoid depletion
13	leopard	female	17	0							hepatic cysts; pancreas: insuloma	erosive-ulcerative stomatitis		concrements	lympho-plasmacytic inflammation		uterine leiomyoma; ovarian leiomyoma; hemo- and mucometra
14	lion	female	13	1	70	granulomatous pneumonia, interstitial pneumonia alveolar histiocytosis, anthracosis					liver: carcinoma	chronic, necrotizing esophagitis with polypoid proliferation; lympho-histiocytic gastritis		degeneration, necrosis; dilation; proteinaceous casts	lympho-plasmacytic and eosinophilic inflammation		pyometra		lymphocytic peritonitis and pyogranulomatous inflammation around removed ovaries	bone marrow: myeloid dominance; splenic hemangiosarcoma, mesenteric lymph nodes: lymphoid depletion and metastasis of carcinoma
15	lion	female	12	3			chronic active pododermatitis			cerebrum, cerebellum, ganglion trigeminale: neuronal lipofuscinosis	Kupffer cell hyperplasia, pigment storage, fibrosis, inflammation, vacuolization, telangiectasia			intra-epithelial pigment			ovarian leiomyoma; uterus: hypertrophy and hyalinization of media of uterine arteries			bone marrow: myeloid dominance
16	lion	female	3	1	250	pleuritis, mycotic pneumonia	perforating trauma (thorax)			cerebrum: status spongiosus, meningeal pigmentation		tongue: papilloma, ulcerative gastritis with hemorrhages, jejunum: crypt abscesses, dilation, villus atrophy, reepithelization	membrano-proliferative glomerulonephritis, sclerosis	degeneration, necrosis; intra-epithelial pigment; dilation; proteinaceous casts; concrements	lympho-plasmacytic inflammation; fibrosis	lympho-plasmacytic pyelitis	necrotizing placentitis with mineralizations	lipomatosis cordis	Botulism
17	lion	female	11	5				arthrosis shoulder joint			Kupffer cell hyperplasia, pigment storage	intestinal amyloidosis; catarrhal enteritis with loss of epithelial cells in crypts, crypt abscesses and epithelial regeneration		degeneration, necrosis; intra-epithelial pigment; proteinaceous casts; concrements	lympho-plasmacytic inflammation; fibrosis		pyometra with abscess			lymph nodes: lymphoid depletion
18	lion	female	6	0	160	granulomatous pneumonia						erosive-ulcerative gastritis, jejunum: catarrhal enteritis with villus fusion, crypt abscesses, regeneration, fibrosis; melena		proteinaceous casts; concrements	lympho-plasmacytic and metastatic-suppurative inflammation; fibrosis	nephron loss				splenic hemosiderosis, splenic lymphoid depletion
19	lion	male	18	1	200	purulent pneumonia, alveolar histiocytosis, lung: hemosiderosis, fibrosis, anthracosis, heart failure cells, atelectasis	focal, necropurulent myositis (M. supraspinatus), focal, necropurulent dermatitis with fibrosis (right hind leg)	degenerative joint disease	adrenal gland: vacuolization of zona fasciculata, capsule protrusions	cerebrum: neuronal lipofuscinosis and mild vacuolation; pituitary gland and fourth ventricle: psammoma bodies; fourth ventricle: mineralizations, meningeal fibrosis; spinal cord: myelinophagia, dilated myelin sheaths, spheroids, neuronal lipofuscinosis, perivascular macrophages with pigment	hepatic cysts with purulent inflammation, hemosiderosis; hyperplasia of exocrine pancreas	lympho-plasmacytic gastritis, crypt dilations with debris, jejunum; crypt abscesses, eosinophilic enteritis, amyloid in lamina propria	membranous glomerulonephritis, sclerosis	degeneration, necrosis; intra-epithelial pigment; dilation; concrements	lympho-plasmacytic inflammation; fibrosis	nephron loss; lympho-plasmacytic pyelitis	testicular atrophy, interstitial cell hyperplasia	endocardiosis		spleen: plasmocytosis and granulocytic splenitis; lymph nodes: hemosiderosis
20	lion	male	6	2	> 300		ulceration at paw	diaphragm: swollen myofibers, mineralizations	thyroid gland: amyloid		exocrine pancreas: amyloid	jejunum: lympho-histiocytic and granulocytic enteritis with crypt abscesses and fibrosis of lamina propria		degeneration, necrosis; intra-epithelial pigment; proteinaceous casts; concrements	lympho-plasmacytic and metastatic-suppurative inflammation; fibrosis	nephron loss		focal lympho-histiocytic myocarditis
21	tiger	male	16	0	270	thoracic biphasic mesothelioma, necropurulent pneumonia with fibrinoid vasculitis				psammoma bodies in the 4th ventricle	fibrinopurulent and necrotizing hepatitis; pancreas carcinoma with metastases in the lymph nodes	ulcerative gastritis		degeneration, necrosis; intra-epithelial pigment; dilation; proteinaceous casts; concrements	lympho-plasmacytic inflammation; fibrosis	nephron loss			fibrinopurulent, abdominal steatitis and peritonitis, biphasic thoracic mesothelioma, chylothorax
22	tiger	female	22	0	> 300			thoracic and lumbar spondyloses, multiple intervertebral disc protrusions, chondroid metaplasia of intervertebral disc material, myelofibrosis	thyroid gland: unilateral focal hyperplasia, unilateral adenoma; adrenal gland: cortical hyperplasia	spinal cord (thoracic): single spheroids		severe grinding of canini with opening of pulpa, gingivitis, dental calculi	membrano-proliferative glomerulonephritis	proteinaceous casts; concrements	fibrosis	lympho-plasmacytic pyelitis	uterine leiomyomas, uterine glandular atrophy, ovary: multiple mineralizations			spleen: lymphoid depletion
23	tiger	female	15	0	220	fibrinopurulent pleuritis and lympho-histiocytic pneumonia, alveolar histiocytosis, lung mineralizations, pneumothorax (traumatic)	right thorax: hemorrhages, muscle fiber degeneration, purulent myositis, thrombi, foreign material (traumatic)				pigment storage, inflammation, hepatic cysts	jejunum: prominent lymph follicle		degeneration, necrosis; intra-epithelial pigment; concrements	lympho-plasmacytic inflammation; fibrosis		uterine leiomyoma		icterus
24	tiger	female	8	1	100	lympho-histiocytic pneumonia				neuronal lipofuscinosis		tongue: papilloma					uterus: endometritis with glandular cystic hyperplasia, Arteria uterina sinistra: hemorrhages, fibrin, fibrosis of arterial muscles	myocardial fibrosis, hyalinization of heart vessels with obstruction	necropurulent peritonitis, omentitis, serositis	lung lymph node: lymphoid depletion; bone marrow: myeloid dominance
25	tiger	male	19	1	< 50	lymphocytic pneumonia, lung fibrosis, anthracosis, mineralizations, mediastinal and pericardial mesothelioma with pleural effusions, metastasis to lung lymph nodes, vascular tumor cell emboli		spondyloses, coxarthroses	thyroid gland adenoma, thyroidal amyloidosis, lymphocytic thyroiditis; hyperplasia of the parathyroid gland; adrenal gland: metastasis of mesothelioma	hippocampal vessels: mineralizations; brain stem: spheroids, spinal cord (intumescentia lumbalis): myelin sheaths dilations, psammoma bodies; Nervus ischiadicus: amyloidosis; chromatolytic neurons in ganglion coeliacum	lymphocytic interstitial pancreatitis	lympho-histiocytic enteritis (jejunum)	mesangio-proliferative glomerulonephritis, sclerosis	degeneration, necrosis; proteinaceous casts; basement membrane mineralization	lympho-plasmacytic inflammation; fibrosis	nephron loss		myocardial fibrosis	hypermature cataract, conjunctivitis	splenic torsion
26	tiger	female	19	0	170	lung fibrosis, lung mineralization, and mineralization of arteries with bony metaplasia, cystic tissue of unknown origin in the lung, deposition of cholesterol crystals with granulomatous inflammation; lymphoid laryngeal hyperplasia, rhinitis			adrenalitis, thyroid gland adenoma	neuronal lipofuscinosis, pachymeningeal mineralizations, focal malacia (cerebrum)	pancreatitis	Helicobacter-like organisms (stomach), ulcerative and eosinophilic jejunitis, eosinophilic ileitis	membranous glomerulonephritis	degeneration, necrosis; dilation; proteinaceous casts; concrements; basement membrane mineralization	lympho-plasmacytic inflammation; fibrosis	nephron loss; lympho-plasmacytic pyelitis		aorta: mineralizations		thymus cysts, hemosiderosis in lymph nodes, splenic siderofibrotic plaques; myeloma in spleen, mesovarium, pituitary gland, bone marrow
27	tiger	male	19	1		lung: hemosiderosis, fibrosis, anthracosis, mineralizations, lympho-histiocytic pleuritis, dysplasia and hyperplasia of bronchial epithelium, bronchioloalveolar carcinoma with metastases in thoracic cavity, mediastinum and lung lymph nodes		generalized muscle atrophy; reduced mineralization at border between rips and cartilage with chondrones	adrenal gland: bilateral, cortical hyperplasia, unilateral pheochromocytoma; parathyroid gland: bilateral hyperplasia	spinal cord: neuronal lipofuscinosis	hyperplasia of exocrine pancreas, pancreas fibrosis	eosinophilic enteritis (jejunum)	membrano-proliferative glomerulonephritis, sclerosis	degeneration, necrosis; intra-epithelial pigment; dilation; proteinaceous casts; concrements	lympho-plasmacytic inflammation; fibrosis	nephron loss; lympho-plasmacytic pyelitis; medullary/papillary necrosis		focal endocardial fibrosis
28	tiger	female	18	1	30	lympho-plasmacytic pneumonia, focal purulent bronchitis, pulmonary mineralization, lung fibrosis, anthracosis in lung lymph nodes				cerebrum: mineralization of choroid plexus	pancreas: congophilic angiopathy		membrano-proliferative glomerulonephritis, sclerosis	degeneration, necrosis	lympho-plasmacytic inflammation; fibrosis	nephron loss; lympho-plasmacytic pyelitis	uterine leiomyoma	lipomatosis cordis, kongophil angiopathy		bone marrow: cellular paucity of myeloid lineage
29	tiger	female	22	0	175	anthracosis in lung lymph nodes		muscle atrophy of hind limbs; degenerative joint disease	nodular cortical hyperplasia of adrenal gland, fibrosis at cortico-medullary junction; thyroid gland adenoma, cysts, lympho-plasmacytic thyroiditis	cerebrum: large felid leucoencephalopathy; neuronal lipofuscinosis; brain stem: spheroids; choroid plexus: psammoma bodies; spinal cord: acute hemorrhages, protrusion of intervertebral disc (thoracic segment), loss of intervertebral disc (lumbar segment)	pancreas: interstitial fibrosis		membrano-proliferative glomerulonephritis, sclerosis	degeneration, necrosis; dilation; proteinaceous casts; concrements	lympho-plasmacytic inflammation; fibrosis	nephron loss; lympho-plasmacytic pyelitis	uterus: intimal proliferations of uterine vessels; uterine leiomyoma; ovary: paraovarial cysts	lipomatosis cordis, degenerative vasculopathy, intimal proliferations
30	tiger	female	18	1		interstitial pneumonia, hyperplasia of bronchus associated lymphatic tissue		stifle joint: cartilage defects	adrenal gland: nodular cortical hyperplasia	neuronal lipofuscinosis	Ito cell hyperplasia, liver: hemosiderosis	gastric follicular hyperplasia	sclerosis	degeneration, necrosis; proteinaceous casts; concrements; basement membrane mineralization	lympho-plasmacytic inflammation; fibrosis	nephron loss; lympho-plasmacytic pyelitis	cystic ovaries	lipomatosis cordis
31	tiger	female	6	1		anthracosis		degenerative joint disease		filum terminale: dilated myelin sheaths	Kupffer cell hyperplasia, cholestasis; pancreas: acute hemorrhages	lympho-plasmacytic gastritis, catarrhal enteritis with necrosis of enterocytes, villus atrophy, atypical regenerates, crypt dilation and abscesses	sclerosis	proteinaceous casts; concrements	lympho-plasmacytic and metastatic-suppurative inflammation; fibrosis	lympho-plasmacytic pyelitis		moderator bands, dilation of both ventricles, lipomatosis cordis		tonsil and spleen: mild lymphoid depletion; bone marrow: myeloid dominance
32	tiger	female	19	2	70	lung: hemosiderosis, fibrosis, anthracosis, mineralizations, mild heart failure cells		degenerative joint disease	adrenocortical hyperplasia with capsular protrusions; lymphocytic thyroiditis	leptomeningeal fibrosis, melanocytes in leptomeninx; brain stem: neuronal lipofuscinosis; cerebellum: psammoma bodies; spinal cord: dilated myelin sheaths, lumbar segment: neuronal lipofuscinosis, mild spheroids	hemosiderosis in hepatocytes and Kupffer cells	lympho-plasmacytic gastritis		degeneration, necrosis; proteinaceous casts; concrements; basement membrane mineralization	lympho-plasmacytic inflammation; fibrosis	nephron loss; lympho-plasmacytic pyelitis	cystic ovaries, lympho-plasmacytic urocystitis	lipomatosis cordis		bone marrow: cell rich
33	tiger	female	1	1	300	alveolar histiocytosis, lung mineralization,			thyroid gland: mineralizations	choroid plexus: mineralizations	pancreas: mineralizations with single cell necrosis	gastric mineralizations with single cell necrosis, intestinal nematodes	membrano-proliferative glomerulonephritis	degeneration, necrosis; intra-epithelial pigment; dilation; proteinaceous casts; concrements; basement membrane mineralization	lympho-plasmacytic and eosinophilic inflammation; fibrosis			myocardial degeneration with myofiber and vessel mineralizations	suspected hypervitaminosis D, systemic mineralizations	spleen: hyalinosis, mild lymphoid depletion, hemosiderosis, hypertrophic serosal cells; mesenteric and tracheobronchial lymph nodes: follicular hyperplasia
34	tiger	male	0.7	1	150					cerebrum: Alzheimer type II cells, spheroids, degenerated and vacuolated neurons, microgliosis, perivascular edema; hippocampus: spongiosis in white matter; Purkinje cell loss and degeneration; chromatolytic neurons in ganglion coeliacum	vacuolation of hepatocytes	catarrhal enteritis with bacterial rods (Clostridium sp. and Salmonella sp.)		degeneration, necrosis; concrements	lympho-plasmacytic and eosinophilic inflammation			histiocytic myocarditis, lipomatosis cordis	, ascites, anemia	lymphoid depletion in spleen and thymus
35	tiger	female	1	2	110	purulent rhinitis, lung, trachea: mineralizations	hind leg: necropurulent dermatitis				bile cysts	fractured teeth; gastric mineralizations; catarrhal enteritis	membrano-proliferative glomerulonephritis, sclerosis	dilation; concrements; basement membrane mineralization	eosinophilic inflammation; fibrosis	nephron loss		myocardial fibrosis and mineralizations	suspected hypervitaminosis D, systemic mineralizations	spleen: lymphoid depletion
36	tiger	male	0.9	1	200	purulent rhinitis, lung hemosiderosis, mineralizations, pleural fibrosis, heart failure cells			parathyroid gland: unilateral Kürsteiner cyst	meningeal fibrosis	bile cysts	ulcerative glossitis; gastric and jejunal mineralizations; jejunum: crypt abscesses and reepithelization		dilation; concrements; basement membrane mineralization				myocardial degeneration , aorta: mineralization with mucin deposits	suspected hypervitaminosis D, systemic mineralizations	bone marrow: panmyelophthisis
37	tiger	female	3	0	180			skeletal muscle: lympho-plasma-histiocytic myositis, mineralization and muscle fiber degeneration				tongue: lympho-plasma-histiocytic myositis, mineralization and muscle fiber degeneration; erosive gastritis; jejunum and colon: crypt degeneration and debris, lympho-histiocytic inflammation		degeneration, necrosis; concrements; basement membrane mineralization	lympho-plasmacytic and metastatic-suppurative inflammation; fibrosis	lympho-plasmacytic pyelitis
38	tiger	male	0.5	1	< 50			malformation of both stifle joints, varus deformity				nematodes in jejunum and colon		degeneration, necrosis				moderator bands		thymus atrophy
